# Supplementary material
Source: MDPI journal article supplement (https://www.mdpi.com/2073-4344/8/3/106)
Supplement: s1 [file s1]

Supplementary Materials: Effects of Mesopore Internal Surfaces on the Structure of Immobilized Pd-Bisphosphine Complexes Analyzed by Variable-Temperature XAFS and their Catalytic Performances

Ken Motokura1,2*, Takuma Fukuda1, Yohei Uemura3, Daiju Matsumura4, Marika Ikeda1, Masayuki Nambo1, Wang-Jae Chun5

2. Results and Discussion

**Figure S1.** SEM image of MS(C8)/PP-Pd and line analysis results for Si, P, and Pd elements.

**Table S1.** Parameters determined by the curve-fitting analysis of variable-temperature EXAFS spectra of MS(C12)/PP-Pd [a]

| Temperature [K] | *N* [b] | *r* [c]  [Å] | *σ*2 [d]  [Å2×10–3] | ∆*E* [e]  [eV] | Rf [f]  [%] |
| --- | --- | --- | --- | --- | --- |
| MS(C12)/PP-Pd |  |  |  |  |  |
| 300 | 3 | 2.26  ±0.01 | 3.29  ±0.05 | –10.95  ±2.05 | 2.45 |
| 100 | 2.26  ±0.01 | 2.33  ±0.05 | –11.60  ±2.07 | 1.85 |
| 20 | 2.27  ±0.01 | 2.03  ±0.05 | –10.53  ±2.08 | 1.69 |

[a]Fourier transform and Fourier-filtering regions were limited, where *∆k* = 2.3~13.0 Å-1. and *∆r* = 1.0~2.2 Å, respectively. Curve-fitting analysis was performed for the Pd-P/Cl shell. [b]Coordination number was fixed to 3 (two Pd-P and one Pd-Cl bonds). [c]Bond distance between absorber and backscatter atoms. [d]The Debye-Waller factor (DW) accounts for the difference between the sample and reference. [e]The inner potential correction accounts for the difference in the inner potential between the sample and reference. [f]The goodness of curve fit.
